# Supplementary material for: Novel Zinc-Catalytic Systems for Ring-Opening Polymerization of ε-Caprolactone
Source: MDPI journal article supplement (doi:10.3390/molecules20022816), 2015-02-09
Supplement: s1 [file s1]

## Supplementary Materials

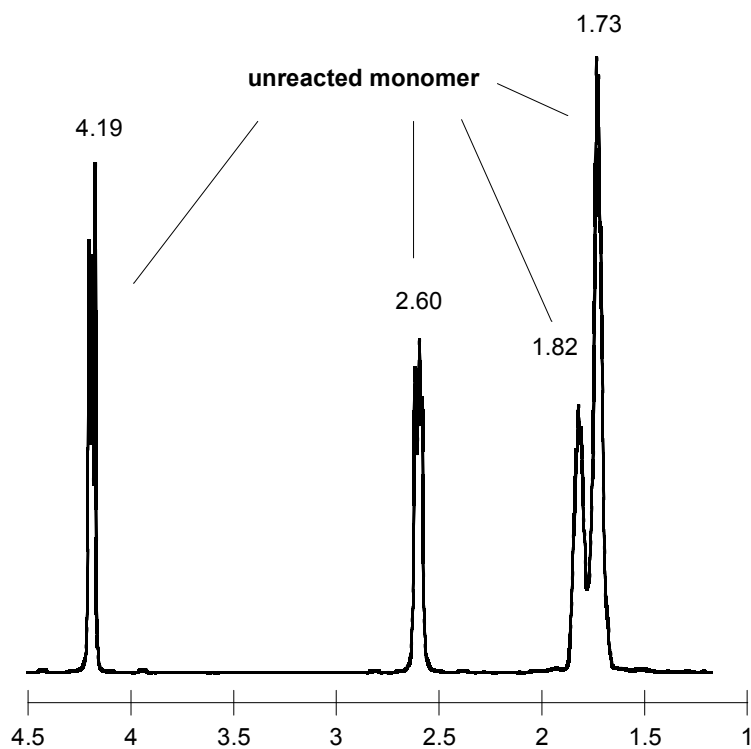

**Figure S1.**  $^1\text{H-NMR}$  spectrum of reaction product carried out in the presence of PGAc (in  $\text{CDCl}_3$ ) (I-2).

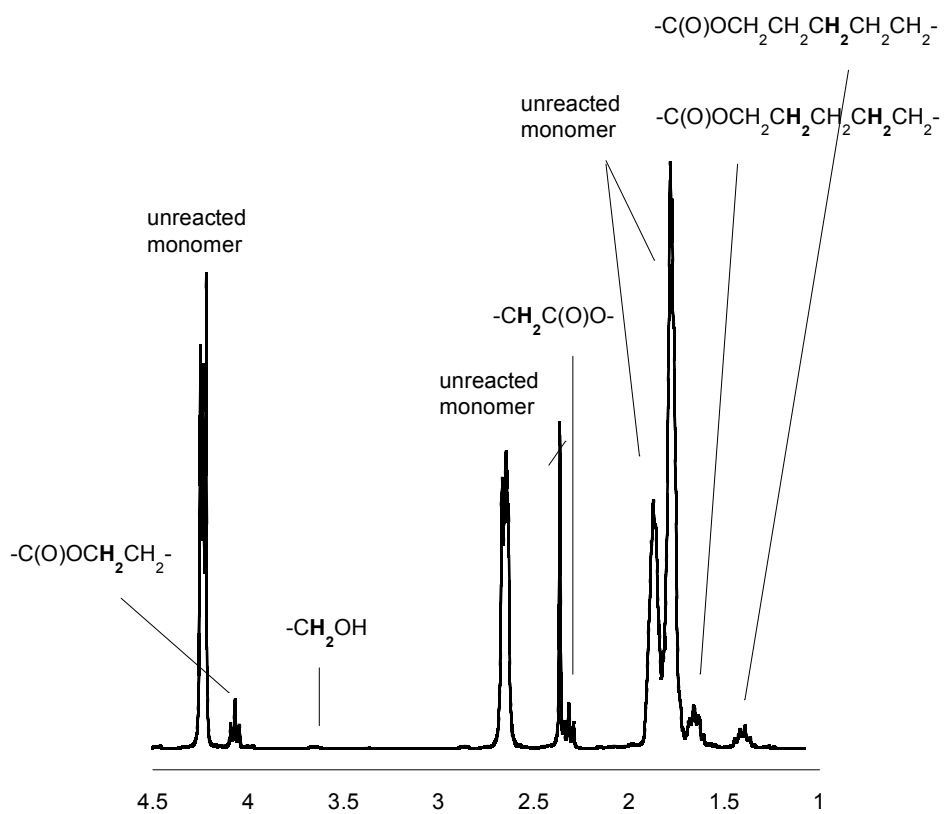

**Figure S2.**  $^1\text{H-NMR}$  spectrum of reaction product carried out in the presence of  $\text{ZnEt}_2$  at  $40^\circ\text{C}$  (in  $\text{CDCl}_3$ ) (C-1).

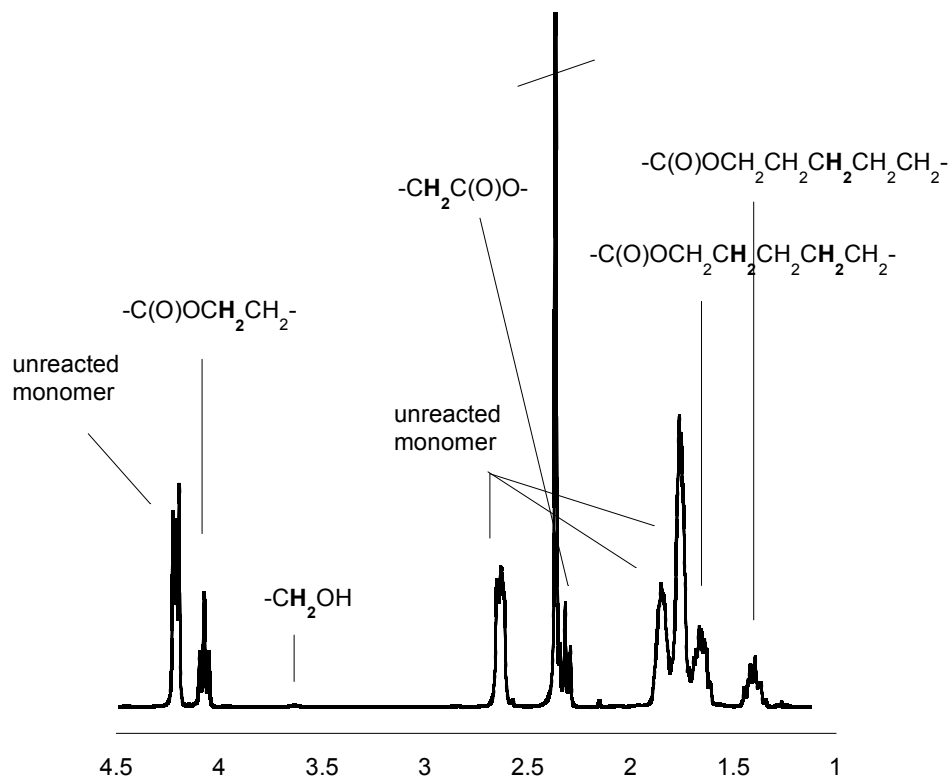

**Figure S3.**  $^1\text{H-NMR}$  spectrum of reaction product carried out in the presence of  $\text{ZnEt}_2$  at  $60^\circ\text{C}$  (in  $\text{CDCl}_3$ ) (C-2).

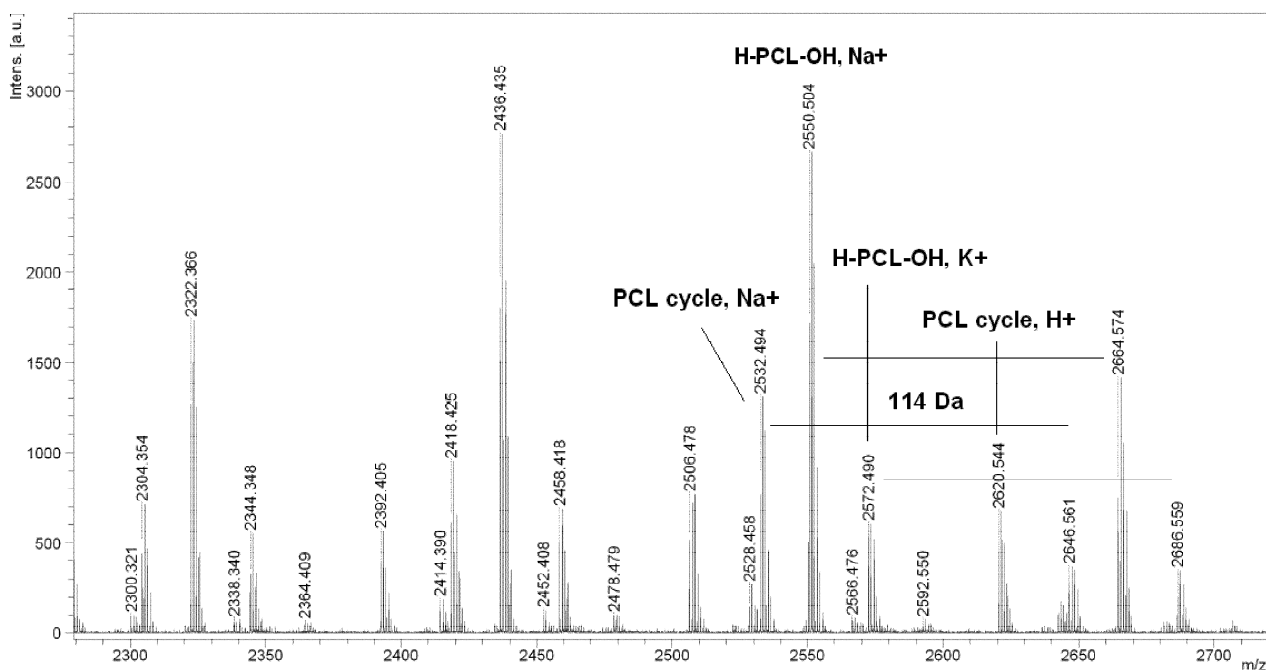

**Figure S4.** MALDI TOF MS spectrum of PCL obtained in the presence of  $\text{ZnEt}_2$  at  $60^\circ\text{C}$  (C-2).
